# Supplementary material for: The essential role of aggregation for the emulsifying ability of a fungal CYS-rich protein
Source: PubMed Central journal article supplement (PMC11147851; doi:10.1007/s00253-024-13182-7), 2024-06-03
Supplement: 253_2024_13182_MOESM1_ESM.pdf [file 253_2024_13182_MOESM1_ESM.pdf]

1 **Applied Microbiology and Biotechnology**

2 **Supplementary Information**

3 **THE ESSENTIAL ROLE OF AGGREGATION FOR THE EMULSIFYING**  
4 **ABILITY OF A FUNGAL CYS-RICH PROTEIN**

5 Rossana Pitocchi<sup>1</sup>, Paola Cicatiello<sup>1\*</sup>, Anna Illiano<sup>1</sup>, Carolina Fontanarosa<sup>1</sup>, Federica Spina<sup>2</sup>,  
6 Giovanna Cristina Varese<sup>2</sup>, Angela Amoresano<sup>1</sup>, Alessandra Piscitelli<sup>1</sup>, Paola Giardina<sup>1</sup>

7  
8 <sup>1</sup>Department of Chemical Sciences, University of Naples Federico II, Via Cintia, 80126 Naples, Italy.

9 <sup>2</sup>Department of Life Sciences and Systems Biology, University of Turin, Viale P.A. Mattioli 25, 10125 Turin, Italy

10 \*Correspondence: [paola.cicatiello@unina.it](mailto:paola.cicatiello@unina.it); Tel. +3908174327  
11

12  
13  
14

**Table S1:** List of precursor ion, product ions, collision energy and declustering potential parameters for the analysis of the phenolic compounds using LC-MRM-MS/MS in negative (ESI-) ionization modes. (Declustering DP and Collision Energy CE).

| Precursor | Product | Dwell | Analyte       | DP      | CE      |
|-----------|---------|-------|---------------|---------|---------|
| 285.000   | 151.000 | 50.0  | Kaempferol    | -86.000 | -28.000 |
| 285.000   | 92.800  | 50.0  | Kaempferol    | -86.000 | -28.000 |
| 285.000   | 133.000 | 50.0  | Kaempferol    | -60.000 | -28.000 |
| 242.800   | 158.900 | 50.0  | Piceatannol   | -36.000 | -38.000 |
| 242.800   | 201.000 | 50.0  | Piceatannol   | -36.000 | -38.000 |
| 431.000   | 268.700 | 50.0  | Genistin      | -86.000 | -18.000 |
| 431.000   | 132.800 | 50.0  | Genistin      | -86.000 | -18.000 |
| 609.000   | 301.000 | 50.0  | Rutin         | -60.000 | -30.000 |
| 609.000   | 299.800 | 50.0  | Rutin         | -61.000 | -50.000 |
| 609.000   | 270.900 | 50.0  | Rutin         | -61.000 | -50.000 |
| 579.100   | 270.800 | 50.0  | Naringin      | -96.000 | -56.000 |
| 579.100   | 150.800 | 50.0  | Naringin      | -96.000 | -56.000 |
| 227.000   | 185.000 | 50.0  | Resveratrol   | -96.000 | -32.000 |
| 227.000   | 143.000 | 50.0  | Resveratrol   | -96.000 | -32.000 |
| 316.800   | 150.800 | 50.0  | Myricetin     | -56.000 | -36.000 |
| 316.800   | 178.900 | 50.0  | Myricetin     | -56.000 | -36.000 |
| 286.800   | 150.700 | 50.0  | Eriodictyol   | -31.000 | -22.000 |
| 286.800   | 134.900 | 50.0  | Eriodictyol   | -31.000 | -22.000 |
| 356.900   | 82.900  | 50.0  | Matairesinol  | -31.000 | -36.000 |
| 356.900   | 137.000 | 50.0  | Matairesinol  | -31.000 | -36.000 |
| 301.000   | 252.900 | 50.0  | Enterodiol    | -56.000 | -26.000 |
| 301.000   | 106.000 | 50.0  | Enterodiol    | -56.000 | -26.000 |
| 300.900   | 150.900 | 50.0  | Quercetin     | -56.000 | -32.000 |
| 300.900   | 178.600 | 50.0  | Quercetin     | -56.000 | -32.000 |
| 284.900   | 174.900 | 50.0  | Cyanidin      | -61.000 | -32.000 |
| 284.900   | 240.800 | 50.0  | Cyanidin      | -61.000 | -32.000 |
| 285.000   | 132.900 | 50.0  | Luteolin      | -61.000 | -46.000 |
| 285.000   | 150.900 | 50.0  | Luteolin      | -61.000 | -46.000 |
| 285.000   | 217.000 | 50.0  | Luteolin      | -60.000 | -46.000 |
| 285.000   | 199.000 | 50.0  | Luteolin      | -60.000 | -46.000 |
| 296.900   | 106.900 | 50.0  | Enterolactone | -46.000 | -46.000 |
| 296.900   | 253.000 | 50.0  | Enterolactone | -46.000 | -46.000 |
| 288.800   | 245.000 | 50.0  | Catechin      | -71.000 | -22.000 |
| 288.800   | 108.900 | 50.0  | Catechin      | -71.000 | -22.000 |
| 166.600   | 123.100 | 50.0  | Vanillic acid | -61.000 | -18.000 |
| 166.600   | 107.800 | 50.0  | Vanillic acid | -61.000 | -18.000 |
| 178.700   | 107.200 | 50.0  | Caffeic acid  | -21.000 | -22.000 |
| 288.800   | 244.800 | 50.0  | Epicatechin   | -76.000 | -22.000 |
| 288.800   | 109.100 | 50.0  | Epicatechin   | -76.000 | -22.000 |
| 300.900   | 256.700 | 50.0  | Delphinidin   | -51.000 | -20.000 |
| 300.900   | 190.800 | 50.0  | Delphinidin   | -51.000 | -20.000 |
| 268.800   | 240.900 | 50.0  | Pelargonidin  | -61.000 | -26.000 |

|         |         |      |                                   |          |         |
|---------|---------|------|-----------------------------------|----------|---------|
| 268.800 | 200.700 | 50.0 | Pelargonidin                      | -61.000  | -26.000 |
| 163.000 | 162.000 | 50.0 | TranspCoumaric acid               | -35.000  | -20.000 |
| 163.000 | 119.000 | 50.0 | TranspCoumaric acid               | -35.000  | -20.000 |
| 300.800 | 163.900 | 50.0 | Haesperetin                       | -51.000  | -34.000 |
| 300.800 | 150.900 | 50.0 | Haesperetin                       | -51.000  | -34.000 |
| 268.600 | 132.900 | 50.0 | Genistein                         | -101.000 | -44.000 |
| 268.600 | 159.000 | 50.0 | Genistein                         | -101.000 | -44.000 |
| 267.000 | 210.900 | 50.0 | Coumestrol                        | -81.000  | -38.000 |
| 267.000 | 238.800 | 50.0 | Coumestrol                        | -80.000  | -44.000 |
| 268.800 | 116.900 | 50.0 | Apigenin                          | -46.000  | -44.000 |
| 268.800 | 150.800 | 50.0 | Apigenin                          | -45.000  | -30.000 |
| 266.800 | 251.700 | 50.0 | Formonetin                        | -91.000  | -30.000 |
| 266.800 | 222.800 | 50.0 | Formonetin                        | -90.000  | -28.000 |
| 282.800 | 267.500 | 50.0 | Glycitein                         | -101.000 | -28.000 |
| 282.800 | 240.000 | 50.0 | Glycitein                         | -100.000 | -32.000 |
| 282.900 | 267.800 | 50.0 | Biochanin A                       | -76.000  | -28.000 |
| 282.900 | 238.800 | 50.0 | Biochanin A                       | -76.000  | -28.000 |
| 254.900 | 239.900 | 50.0 | Pterosilbene                      | -31.000  | -28.000 |
| 449.000 | 431.000 | 50.0 | Luteolin6cglucoside (ISOORIENTIN) | -60.000  | -30.000 |
| 449.000 | 285.000 | 50.0 | Luteolin6cglucoside (ISOORIENTIN) | -60.000  | -30.000 |
| 449.000 | 377.000 | 50.0 | Luteolin6cglucoside (ISOORIENTIN) | -60.000  | -30.000 |
| 431.000 | 311.000 | 50.0 | Apigenin8cglucoside (VITEXIN)     | -55.000  | -30.000 |
| 431.000 | 269.000 | 50.0 | Apigenin8cglucoside (VITEXIN)     | -55.000  | -30.000 |
| 431.000 | 341.000 | 50.0 | Apigenin8cglucoside (VITEXIN)     | -55.000  | -30.000 |
| 464.000 | 301.000 | 50.0 | Quercetin3Ogalactoside            | -60.000  | -38.000 |
| 464.000 | 463.000 | 50.0 | Quercetin3Ogalactoside            | -60.000  | -38.000 |
| 594.000 | 593.000 | 50.0 | Kaempferol3Orutinoside            | -65.000  | -45.000 |
| 594.000 | 285.000 | 50.0 | Kaempferol3Orutinoside            | -65.000  | -45.000 |
| 316.000 | 300.000 | 50.0 | Isorhamnetin                      | -60.000  | -30.000 |
| 316.000 | 151.000 | 50.0 | Isorhamnetin                      | -60.000  | -30.000 |
| 316.000 | 315.000 | 50.0 | Isorhamnetin                      | -60.000  | -30.000 |
| 538.000 | 537.000 | 50.0 | Amentoflavone                     | -60.000  | -40.000 |
| 538.000 | 375.000 | 50.0 | Amentoflavone                     | -60.000  | -40.000 |
| 353.000 | 191.000 | 50.0 | Caffeoylquinic acid derivative    | -60.000  | -30.000 |
| 353.000 | 179.000 | 50.0 | Caffeoylquinic acid derivative    | -60.000  | -30.000 |
| 609.000 | 463.000 | 50.0 | Quercetin rutinoside              | -60.000  | -30.000 |
| 609.000 | 300.000 | 50.0 | Quercetin rutinoside              | -60.000  | -30.000 |
| 505.000 | 463.000 | 50.0 | Quercetin acetylhexoside          | -60.000  | -30.000 |
| 505.000 | 445.000 | 50.0 | Quercetin acetylhexoside          | -60.000  | -30.000 |
| 183.000 | 169.000 | 50.0 | Methyl gallate                    | -60.000  | -20.000 |
| 183.000 | 125.000 | 50.0 | Methyl gallate                    | -60.000  | -20.000 |
| 593.000 | 425.000 | 50.0 | EGCepicatechin dimer              | -60.000  | -30.000 |
| 197.000 | 169.000 | 50.0 | Ethyl gallate                     | -60.000  | -20.000 |
| 197.000 | 125.000 | 50.0 | Ethyl gallate                     | -60.000  | -20.000 |
| 729.000 | 577.000 | 50.0 | Procyanidin dimer gallate         | -60.000  | -30.000 |
| 493.000 | 317.000 | 50.0 | Myricetin3Oglucuronide            | -40.000  | -25.000 |

|         |         |      |                              |         |         |
|---------|---------|------|------------------------------|---------|---------|
| 479.000 | 317.000 | 50.0 | Myricetin3Oglucoside         | -40.000 | -25.000 |
| 441.000 | 289.000 | 50.0 | EC3Ogallate                  | -60.000 | -30.000 |
| 441.000 | 169.000 | 50.0 | EC3Ogallate                  | -60.000 | -30.000 |
| 389.000 | 227.000 | 50.0 | Cisresveratrol3Oglucoside    | -40.000 | -25.000 |
| 561.000 | 289.000 | 50.0 | EfisetinidolEC isomer 2      | -71.000 | -22.000 |
| 561.000 | 273.000 | 50.0 | EfisetinidolEC isomer 3      | -71.000 | -22.000 |
| 745.000 | 457.000 | 50.0 | EGCEGC gallate               | -60.000 | -20.000 |
| 745.000 | 169.000 | 50.0 | EGCEGC gallate               | -60.000 | -20.000 |
| 619.000 | 457.000 | 50.0 | EGC gallate glucoside        | -60.000 | -20.000 |
| 619.000 | 305.000 | 50.0 | EGC gallate glucoside        | -60.000 | -20.000 |
| 609.000 | 457.000 | 50.0 | EGC digallate                | -60.000 | -20.000 |
| 609.000 | 305.000 | 50.0 | EGC digallate                | -60.000 | -30.000 |
| 455.000 | 289.000 | 50.0 | EC methyl gallate            | -60.000 | -30.000 |
| 455.000 | 183.000 | 50.0 | EC methyl gallate            | -60.000 | -30.000 |
| 425.000 | 169.000 | 50.0 | EAFzelechichin gallate       | -60.000 | -30.000 |
| 715.000 | 563.000 | 50.0 | Theaflavin gallate           | -60.000 | -30.000 |
| 715.000 | 545.000 | 50.0 | Theaflavin gallate           | -60.000 | -30.000 |
| 867.000 | 715.000 | 50.0 | Theaflavin diglallate        | -60.000 | -30.000 |
| 867.000 | 563.000 | 50.0 | Theaflavin diglallate        | -60.000 | -30.000 |
| 563.000 | 545.000 | 50.0 | Theaflavin                   | -60.000 | -30.000 |
| 153.100 | 133.000 | 50.0 | Protocatechuic Acid          | -40.000 | -20.000 |
| 153.100 | 109.000 | 50.0 | Protocatechuic Acid          | -40.000 | -20.000 |
| 153.100 | 93.000  | 50.0 | Protocatechuic Acid          | -40.000 | -20.000 |
| 353.300 | 191.000 | 50.0 | Chlorogenic Acid             | -50.000 | -20.000 |
| 353.300 | 163.000 | 50.0 | Chlorogenic Acid             | -50.000 | -20.000 |
| 353.300 | 145.000 | 50.0 | Chlorogenic Acid             | -50.000 | -20.000 |
| 353.300 | 179.000 | 50.0 | Chlorogenic Acid             | -50.000 | -30.000 |
| 353.300 | 135.000 | 50.0 | Chlorogenic Acid             | -50.000 | -30.000 |
| 335.300 | 179.000 | 50.0 | Caffeoyliquinic Acid Lactone | -60.000 | -30.000 |
| 335.300 | 161.000 | 50.0 | Caffeoyliquinic Acid Lactone | -60.000 | -30.000 |
| 193.200 | 149.000 | 50.0 | Ferulic Acid                 | -40.000 | -20.000 |
| 193.200 | 134.000 | 50.0 | Ferulic Acid                 | -40.000 | -20.000 |
| 591.200 | 283.000 | 50.0 | Linarin                      | -40.000 | -18.000 |
| 591.200 | 447.000 | 50.0 | Linarin                      | -40.000 | -18.000 |
| 591.200 | 420.000 | 50.0 | Linarin                      | -40.000 | -18.000 |
| 415.400 | 295.000 | 50.0 | Puerarin                     | -40.000 | -30.000 |
| 415.400 | 325.000 | 50.0 | Puerarin                     | -40.000 | -30.000 |
| 415.400 | 399.000 | 50.0 | Puerarin                     | -40.000 | -45.000 |
| 415.400 | 381.000 | 50.0 | Puerarin                     | -40.000 | -45.000 |
| 299.300 | 284.000 | 50.0 | Diosmetin                    | -40.000 | -26.000 |
| 299.300 | 153.000 | 50.0 | Diosmetin                    | -40.000 | -26.000 |
| 299.300 | 201.000 | 50.0 | Diosmetin                    | -40.000 | -26.000 |
| 299.300 | 55.000  | 50.0 | Diosmetin                    | -40.000 | -26.000 |
| 769.700 | 768.000 | 50.0 | Typhanoside                  | -40.000 | -35.000 |
| 769.700 | 314.000 | 50.0 | Typhanoside                  | -40.000 | -35.000 |
| 447.400 | 327.000 | 50.0 | Astragalin                   | -40.000 | -35.000 |

|         |         |      |                                |         |         |
|---------|---------|------|--------------------------------|---------|---------|
| 447.400 | 284.000 | 50.0 | Astragalin                     | -40.000 | -35.000 |
| 163.200 | 147.000 | 50.0 | Coumaric Acid                  | -40.000 | -20.000 |
| 163.200 | 119.000 | 50.0 | Coumaric Acid                  | -40.000 | -20.000 |
| 163.200 | 91.000  | 50.0 | Coumaric Acid                  | -40.000 | -20.000 |
| 337.300 | 191.000 | 50.0 | 3PCoumaroylquinic Acid         | -40.000 | -30.000 |
| 337.300 | 163.000 | 50.0 | 3PCoumaroylquinic Acid         | -40.000 | -30.000 |
| 447.300 | 431.000 | 50.0 | Orientin                       | -40.000 | -30.000 |
| 447.300 | 413.000 | 50.0 | Orientin                       | -40.000 | -30.000 |
| 447.300 | 357.000 | 50.0 | Orientin                       | -40.000 | -30.000 |
| 447.300 | 285.000 | 50.0 | Orientin                       | -40.000 | -30.000 |
| 447.400 | 285.000 | 50.0 | Luteolin7OGlucoside            | -60.000 | -30.000 |
| 447.400 | 153.000 | 50.0 | Luteolin7OGlucoside            | -60.000 | -30.000 |
| 447.400 | 60.000  | 50.0 | Luteolin7OGlucoside            | -60.000 | -30.000 |
| 577.500 | 270.000 | 50.0 | Isorhoifolin                   | -60.000 | -40.000 |
| 577.500 | 269.000 | 50.0 | Isorhoifolin                   | -60.000 | -40.000 |
| 577.500 | 45.000  | 50.0 | Isorhoifolin                   | -60.000 | -40.000 |
| 463.400 | 43.000  | 50.0 | Hyperoside                     | -60.000 | -38.000 |
| 463.400 | 301.000 | 50.0 | Hyperoside                     | -60.000 | -38.000 |
| 447.400 | 301.000 | 50.0 | QuercetinORhamnoside           | -60.000 | -30.000 |
| 447.400 | 431.000 | 50.0 | QuercetinORhamnoside           | -60.000 | -30.000 |
| 461.900 | 299.000 | 50.0 | QuercetinOHexoside             | -60.000 | -30.000 |
| 593.500 | 285.000 | 50.0 | Nicotinflorin                  | -60.000 | -45.000 |
| 593.500 | 257.000 | 50.0 | Nicotinflorin                  | -60.000 | -45.000 |
| 593.500 | 449.000 | 50.0 | Nicotinflorin                  | -60.000 | -45.000 |
| 431.100 | 285.000 | 50.0 | Kaempferol3ORhamnoside         | -60.000 | -30.000 |
| 271.200 | 153.000 | 50.0 | Naringenin                     | -60.000 | -30.000 |
| 271.200 | 177.000 | 50.0 | Naringenin                     | -60.000 | -30.000 |
| 271.200 | 119.000 | 50.0 | Naringenin                     | -60.000 | -30.000 |
| 271.200 | 107.000 | 50.0 | Naringenin                     | -60.000 | -30.000 |
| 271.200 | 93.000  | 50.0 | Naringenin                     | -60.000 | -30.000 |
| 271.200 | 83.000  | 50.0 | Naringenin                     | -60.000 | -30.000 |
| 433.400 | 271.000 | 50.0 | Naringenin7OGlucoside          | -60.000 | -20.000 |
| 433.400 | 295.000 | 50.0 | Naringenin7OGlucoside          | -60.000 | -20.000 |
| 433.400 | 270.000 | 50.0 | Naringenin7OGlucoside          | -60.000 | -20.000 |
| 579.500 | 271.000 | 50.0 | Naringenin7ONeohesperidoside   | -80.000 | -35.000 |
| 579.500 | 459.000 | 50.0 | Naringenin7ONeohesperidoside   | -80.000 | -35.000 |
| 623.500 | 314.000 | 50.0 | Isorhamnetin3ONeohesperidoside | -80.000 | -43.000 |
| 179.200 | 67.000  | 50.0 | Theobromine                    | -45.000 | -30.000 |
| 179.200 | 109.000 | 50.0 | Theobromine                    | -45.000 | -30.000 |
| 179.200 | 83.000  | 50.0 | Theobromine                    | -45.000 | -30.000 |
| 179.200 | 69.000  | 50.0 | Theobromine                    | -45.000 | -30.000 |
| 179.200 | 138.000 | 50.0 | Theobromine                    | -45.000 | -30.000 |
| 193.200 | 109.000 | 50.0 | Caffeine                       | -45.000 | -30.000 |
| 193.200 | 123.000 | 50.0 | Caffeine                       | -45.000 | -30.000 |
| 193.200 | 153.000 | 50.0 | Caffeine                       | -45.000 | -30.000 |
| 193.200 | 60.000  | 50.0 | Procynadin B2                  | -45.000 | -22.000 |

|         |         |      |                      |         |         |
|---------|---------|------|----------------------|---------|---------|
| 135.200 | 54.000  | 50.0 | Tetramethyl Pyrazine | -45.000 | -22.000 |
| 135.200 | 80.000  | 50.0 | Tetramethyl Pyrazine | -45.000 | -22.000 |
| 135.200 | 121.000 | 50.0 | Tetramethyl Pyrazine | -45.000 | -22.000 |
| 135.200 | 96.000  | 50.0 | Tetramethyl Pyrazine | -45.000 | -22.000 |
| 121.200 | 54.000  | 50.0 | Trimethyl Pyrazine   | -45.000 | -22.000 |
| 121.200 | 42.000  | 50.0 | Trimethyl Pyrazine   | -45.000 | -22.000 |
| 121.200 | 39.000  | 50.0 | Trimethyl Pyrazine   | -45.000 | -22.000 |
| 865.800 | 289.000 | 50.0 | Procynadin C1        | -45.000 | -22.000 |
| 865.800 | 393.000 | 50.0 | Procynadin C1        | -45.000 | -22.000 |
| 865.800 | 713.000 | 50.0 | Procynadin C1        | -45.000 | -22.000 |
| 865.800 | 849.000 | 50.0 | Procynadin C1        | -45.000 | -22.000 |
| 865.800 | 577.000 | 50.0 | Procynadin C1        | -45.000 | -22.000 |
| 577.500 | 427.000 | 50.0 | Procynadin B2        | -45.000 | -22.000 |
| 577.500 | 291.000 | 50.0 | Procynadin B2        | -45.000 | -22.000 |
| 577.500 | 561.000 | 50.0 | Procynadin B2        | -45.000 | -22.000 |
| 575.500 | 109.000 | 50.0 | Proanthocyanidin A2  | -45.000 | -22.000 |
| 575.500 | 139.000 | 50.0 | Proanthocyanidin A2  | -45.000 | -22.000 |
| 575.500 | 559.000 | 50.0 | Proanthocyanidin A2  | -45.000 | -22.000 |
| 169.000 | 52.000  | 50.0 | Gallic acid          | -64.000 | -45.000 |
| 169.000 | 125.000 | 50.0 | Gallic acid          | -64.000 | -20.000 |
| 169.000 | 80.000  | 50.0 | Gallic acid          | -64.000 | -30.000 |
| 169.000 | 126.000 | 50.0 | Gallic acid          | -49.000 | -21.000 |
| 169.000 | 124.900 | 50.0 | Gallic acid          | -66.000 | -20.000 |
| 169.000 | 106.800 | 50.0 | Gallic acid          | -66.000 | -18.000 |

15

16

17

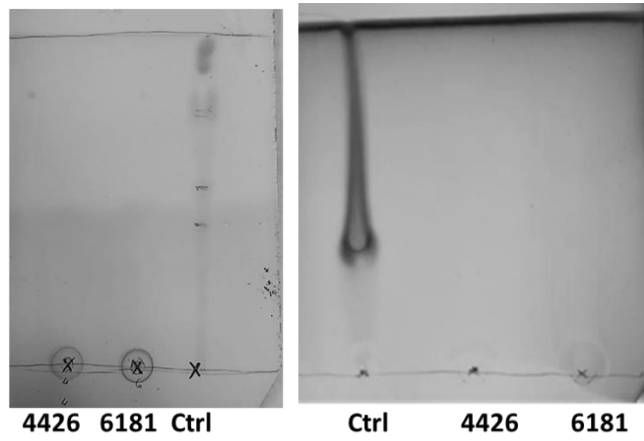

18

19

20

21

22

**Fig S1:** TLC of the extracted broths, stained by phosphomolybdic acid (10% w/v EtOH) for lipids detection on the right, and sulfuric acid (3% v/v) for sugars detection on the left. Olive oil was used as a control in both experiments.

A)

| FS 4426                   |                           |                                               |
|---------------------------|---------------------------|-----------------------------------------------|
| Identified peptides       | Protein sequence coverage | Protein accession number                      |
| K.TCTEANMFLCMCKIK.A       | 41%                       | C7Z2B1_NECH7<br>gi 302897631<br><b>C7Z2B1</b> |
| K.IKALTLAYR.D             |                           |                                               |
| K.DCACSSCLTPQSKLDAIATGK.D |                           |                                               |
| K.ALTLAYR.D               |                           |                                               |
| K.ALTLAYRDCACSSCLTPQSK.L  |                           |                                               |
| K.LDAIATGK.D              |                           |                                               |

| FS 6181               |                           |                                               |
|-----------------------|---------------------------|-----------------------------------------------|
| Identified peptides   | Protein sequence coverage | Protein accession number                      |
| K. DICNQYQAPVAWLPTCPA | 47%                       | C7Z2B1_NECH7<br>gi 302897631<br><b>C7Z2B1</b> |
| K. LDAIATGK.D         |                           |                                               |
| K.DCACSSCLTPQSK.L     |                           |                                               |
| K.ALTLAYR.D           |                           |                                               |

24

B)

25

MKVSAFLSSVAVTLASIGSANAATPLCAITCF TAVMNHEAAKCTEANMFLCM

26

CKIKALTLAYRDCACSSCLTPQSKLDAIATGKDCNQYQAPVAWLPTCPA

27

C)

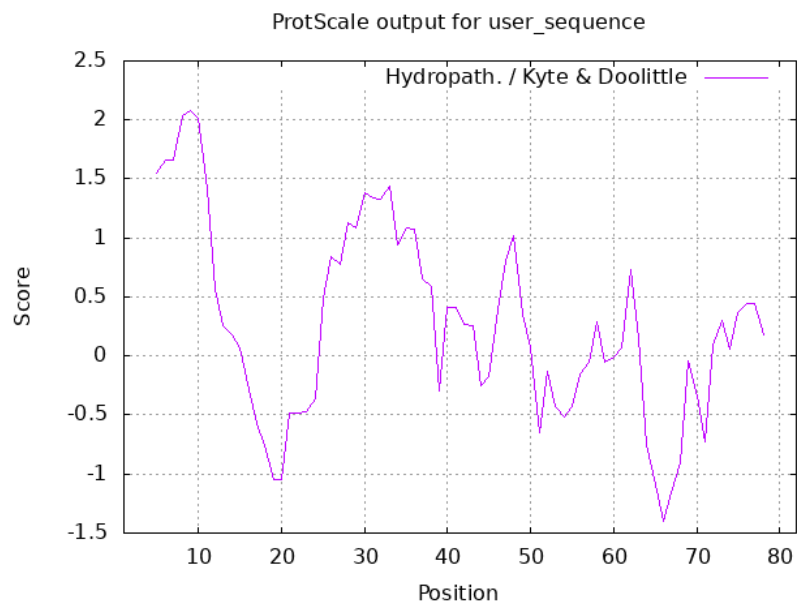

28

29

30

31

**Fig. S2:** A) Overview tables of protein identification. B) Identified protein sequence. ; the Cys typical of CFEM domain are highlighted in yellow, the additional Cys in red. C) Hydropathy plot of the identified protein (without signal peptide) obtained with Expsy protScale tool.

32



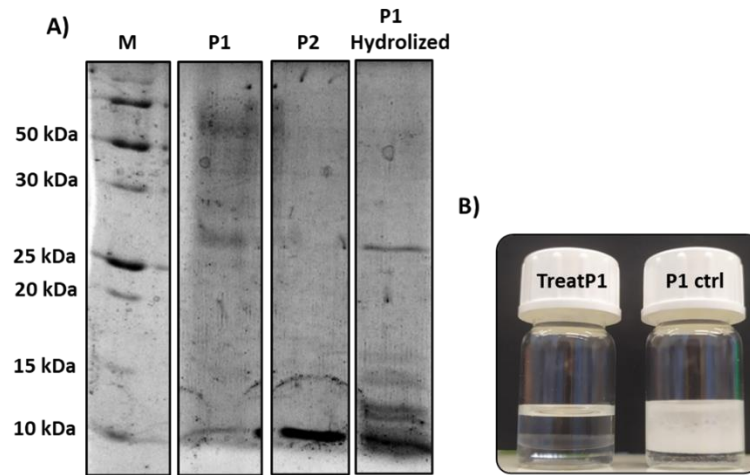

33

34

35

36

37

**Fig. S3:** A) SDS-PAGE of P1 after incubation with proteinase K (P1 hydrolyzed); P1 and P2 were loaded as controls. B) emulsion formed after (Treat P1) and before (P1 ctrl) hydrolysis with Proteinase K.

38  
39  
40  
41

**Table S2:** List of the polyphenols detected in the chromatographic peaks successive gel chromatography, with LC-MS/MS, MRM mode. The standard used to perform the quantitative analysis is gallic acid. (nd: not detected)

| Poliphenol                                         | P1    | P2    | P3             |
|----------------------------------------------------|-------|-------|----------------|
|                                                    | µg/L  |       |                |
| <b>Kaempferol</b>                                  | 12.37 | 8.34  | nd             |
| <b>Rutin</b>                                       | 8.45  | 5.59  | 13.37          |
| <b>Quercetin</b>                                   | 7.95  | 2.21  | 78.37          |
| <b>Cyanidin</b>                                    | 8.84  | 0.36  | 177.9          |
| <b>Luteolin</b>                                    | 41.64 | 2.91  | 23.75          |
| <b>Delphinidin</b>                                 | nd    | nd    | 363.64         |
| <b>Pelargonidin</b>                                | nd    | nd    | nd             |
| <b>Haesperetin</b>                                 | 5.52  | 1.62  | 46.65          |
| <b>luteolin<sub>6</sub>glucoside (ISOORIENTIN)</b> | 8.29  | 6.63  | 150.42         |
| <b>Quercetin acetylhexoside</b>                    | 2.64  | 2.09  | 15.35          |
| <b>EGCEGC gallate</b>                              | 0.06  | 0.86  | 2.88           |
| <b>EGC gallate glucoside</b>                       | 0.69  | 0.37  | 5.58           |
| <b>Theaflavin gallate</b>                          | 1.04  | 0.95  | 17.89          |
| <b>Theaflavin digallate</b>                        | 2.03  | 1.35  | 9.15           |
| <b>Chlorogenic Acid</b>                            | 6.77  | 34.31 | 617.9          |
| <b>Linarin</b>                                     | 2.24  | 1.66  | 10.5           |
| <b>Diosmetin</b>                                   | 2.03  | 6.09  | 226.72         |
| <b>3P-Coumaroylquinic Acid</b>                     | nd    | nd    | 128.45         |
| <b>Orientin</b>                                    | nd    | 1.5   | 27.47          |
| <b>Luteolin<sub>7</sub>O-Glucoside</b>             | 3.13  | 1.35  | nd             |
| <b>Nicotinflorin</b>                               | 0.61  | 0.31  | 22.19          |
| <b>Naringenin</b>                                  | 9.3   | 32.27 | <b>5645.34</b> |
| <b>Naringenin<sub>7</sub>O-Glucoside</b>           | nd    | 1.29  | 19.75          |
| <b>Procynadin C<sub>1</sub></b>                    | 4.42  | 3.1   | 4.65           |
| <b>Proanthocyanidin A<sub>2</sub></b>              | 0.74  | 0.55  | 3.01           |

42  
43

| Identified peptides         | Sequence coverage | Unique peptides | Score sequest |
|-----------------------------|-------------------|-----------------|---------------|
| LDAIATGKDICNQYQAPVAWLPDTCPA | 58%               | 7               | 33.05         |
| DCACSSCLTPQSK               |                   |                 |               |
| TCTEANMFLCMCK               |                   |                 |               |
| ALTLAYRDCACSSCLTPQSK        |                   |                 |               |
| LDAIATGK                    |                   |                 |               |
| ATLAYR                      |                   |                 |               |
| DICNQYQAPVAWLPDTCPA         |                   |                 |               |

| Identified peptides   | Sequence coverage | Unique peptides | Score sequest |
|-----------------------|-------------------|-----------------|---------------|
| TCTEANMFLCMCK         | 40%               | 6               | 51.65         |
| ALTLAYRDCACSSCLTPQSK  |                   |                 |               |
| TCTEANMFLCMCK         |                   |                 |               |
| DCACSSCLTPQSK         |                   |                 |               |
| DCACSSCLTPQSKLDAIATGK |                   |                 |               |
| LDAIATGK              |                   |                 |               |
| ALTLAYR               |                   |                 |               |

44

45

46

47

48

**Fig. S4:** Identification of proteins presents in P2\*, after anionic exchange. The same protein initially identified, C7Z2B1, was found within two independent experiments, with a good sequence coverage and number of peptides.
